# Supplementary material
Source: publisher figshare collection journal article supplement (https://acs.figshare.com/ndownloader/files/15018989)
Supplement: Supplementary file 1 [file 15018989]

## File description and total energies for DFT calculations

| File name            | Description                                                                 | Total energy (eV) |
|----------------------|-----------------------------------------------------------------------------|-------------------|
| n2                   | N <sub>2</sub> isolated molecule                                            | -16.606           |
| ni3x3                | Ni (111) 3x3 supercell model surface                                        | -234.228          |
| n1-ni3x3             | isolated N atom on Ni (111) 3x3 surface                                     | -242.923          |
| ts-diff-ni3x3        | transition state for N diffusion on Ni (111)                                | -242.297          |
| n+n-ni3x3            | 2 N <sub>ads</sub> (adjacent) on Ni (111)                                   | -251.110          |
| ts-chemical-ni3x3    | transition state for chemical step on Ni (111)                              | -249.471          |
| n2-complex-ni3x3     | N <sub>2</sub> <sup>δ-</sup> on Ni (111)                                    | -250.904          |
| n2-top-ni3x3         | N <sub>2</sub> molecule adsorbed on Ni (111)                                | -251.482          |
| ni6x3-step           | Ni (111) monoatomic step 6x3 supercell model                                | -417.045          |
| n1-step              | isolated N atom on Ni (111) step                                            | -426.033          |
| ts-diff-step         | transition state for N diffusion on Ni (111) step                           | -425.174          |
| n+n-step             | 2 N <sub>ads</sub> (adjacent) on Ni (111) step                              | -434.192          |
| ts-chemical-step     | transition state for chemical step on Ni (111) step                         | -433.132          |
| n2-complex-step      | N <sub>2</sub> <sup>δ-</sup> on Ni (111) step                               | -434.504          |
| n2-ads-step          | N <sub>2</sub> molecule adsorbed on Ni (111) step                           | -434.570          |
| au11ni34             | Au <sub>11</sub> Ni <sub>34</sub> 3x3 supercell model surface (111) surface | -207.360          |
| n1-au11ni34          | isolated N atom on Au <sub>11</sub> Ni <sub>34</sub>                        | -214.673          |
| ts-diff-au11ni34     | transition state for N diffusion on Au <sub>11</sub> Ni <sub>34</sub>       | -213.625          |
| n+n-au11ni34         | 2 N <sub>ads</sub> (adjacent) on Au <sub>11</sub> Ni <sub>34</sub>          | -221.796          |
| ts-chemical-au11ni34 | transition state for chemical step on Au <sub>11</sub> Ni <sub>34</sub>     | -221.114          |
| n2-au11ni34          | N <sub>2</sub> molecule adsorbed on Au <sub>11</sub> Ni <sub>34</sub>       | -224.589          |
